# Supplementary material for: Assessing and addressing the global state of food production data scarcity
Source: Springer Nature journal article supplement (doi:10.1038/s43017-024-00516-2), 2024-02-20
Supplement: 43017_2024_516_MOESM1_ESM.pdf [file 43017_2024_516_MOESM1_ESM.pdf]

# Assessing and addressing the global state of food production data scarcity

In the format provided by the authors and unedited



15 **Table S1. FAIR principles criteria used to assess the transparency of agricultural**  
 16 **census reports.**

|               | Criteria                                                                                         | Score<br>(Y/N) |
|---------------|--------------------------------------------------------------------------------------------------|----------------|
| Findable      | F1. Does the report use persistent identifiers for datasets?                                     | 0-1            |
|               | F2. Does the report include clear metadata about the datasets?                                   | 0-1            |
|               | F3. Is the report easy to find through search engines or repositories?                           | 0-1            |
| Accessible    | A1. Are the datasets openly accessible or are there clear policies for access and sharing?       | 0-1            |
|               | A2. Are the datasets available in a variety of formats to accommodate different users?           | 0-1            |
| Interoperable | I1. Is the data structured and formatted in a way that is compatible with other data sources?    | 0-1            |
|               | I2. Does the report provide clear information about data schemas, ontologies, or standards used? | 0-1            |
| Reusable      | R1. Is the report well-documented with clear licensing and provenance information?               | 0-1            |
|               | R2. Are the datasets suitable for re-use in other contexts or applications?                      | 0-1            |

17  
 18  
 19  
 20  
 21  
 22  
 23  
 24  
 25  
 26  
 27  
 28  
 29  
 30

31

32 **Table S2. Transparency classes assigned for census reports.**

| Score  | Transparency class     |
|--------|------------------------|
| 0      | No agricultural census |
| 1 to 2 | No transparency        |
| 3 to 4 | Low transparency       |
| 5 to 6 | Moderate transparency  |
| 7 to 9 | High transparency      |

33

34

35 **Table S3. Transparency score of each country's agricultural census report according**  
 36 **to FAIR criteria.**  
 37

| Country name                        | Admin Level | Census year | Findable |    |    | Accessible |    | Interoperable |    | Reusable |    | FAIR score |
|-------------------------------------|-------------|-------------|----------|----|----|------------|----|---------------|----|----------|----|------------|
|                                     |             |             | F1       | F2 | F3 | A1         | A2 | I1            | I2 | R1       | R2 |            |
| Afghanistan                         | 2           | 2003        | 1        | 1  | 1  | 1          | 0  | 0             | 1  | 1        | 0  | 6          |
| Albania                             | 1           | 2012        | 1        | 1  | 1  | 1          | 0  | 0             | 0  | 0        | 0  | 4          |
| Algeria                             | 1           | 2001        | 1        | 1  | 1  | 1          | 0  | 0             | 1  | 0        | 0  | 5          |
| American Samoa (US)                 | 2           | 2018        | 1        | 1  | 1  | 1          | 1  | 1             | 1  | 1        | 1  | 9          |
| Andorra                             | 0           | 0           | 0        | 0  | 0  | 0          | 0  | 0             | 0  | 0        | 0  | 0          |
| Angola                              | 1           | 2019        | 0        | 0  | 0  | 1          | 1  | 0             | 1  | 1        | 0  | 4          |
| Anguilla (UK)                       | -99         | 0           | 0        | 0  | 0  | 0          | 0  | 0             | 0  | 0        | 0  | 0          |
| Antigua and Barbuda                 | 0           | 2007        | 1        | 1  | 1  | 0          | 0  | 0             | 0  | 0        | 0  | 3          |
| Argentina                           | 2           | 2018        | 1        | 1  | 1  | 1          | 1  | 1             | 1  | 1        | 1  | 9          |
| Armenia                             | 1           | 2014        | 1        | 1  | 1  | 1          | 1  | 1             | 0  | 0        | 1  | 7          |
| Aruba                               | -99         | 0           | 0        | 0  | 0  | 0          | 0  | 0             | 0  | 0        | 0  | 0          |
| Australia                           | 2           | 2020        | 1        | 0  | 1  | 1          | 1  | 1             | 1  | 1        | 1  | 8          |
| Austria                             | 1           | 2020        | 1        | 1  | 1  | 1          | 1  | 1             | 1  | 1        | 1  | 9          |
| Azerbaijan                          | 2           | 2015        | 1        | 1  | 1  | 1          | 0  | 0             | 1  | 0        | 0  | 5          |
| Bahamas, The                        | 0           | 1994        | 0        | 1  | 1  | 0          | 0  | 0             | 0  | 0        | 0  | 2          |
| Bahrain                             | 0           | 0           | 0        | 0  | 0  | 0          | 0  | 0             | 0  | 0        | 0  | 0          |
| Baker Island (US)                   | -99         | 0           | 0        | 0  | 0  | 0          | 0  | 0             | 0  | 0        | 0  | 0          |
| Bangladesh                          | 2           | 2019        | 1        | 0  | 1  | 1          | 0  | 0             | 1  | 1        | 0  | 5          |
| Barbados                            | 0           | 1989        | 1        | 1  | 0  | 0          | 0  | 0             | 1  | 0        | 0  | 3          |
| Belarus*                            | 1           | 2019        | 1        | 1  | 1  | 1          | 0  | 0             | 1  | 1        | 0  | 6          |
| Belgium                             | 2           | 2020        | 1        | 0  | 1  | 1          | 1  | 1             | 1  | 0        | 1  | 7          |
| Belize                              | 1           | 2011        | 1        | 1  | 1  | 0          | 0  | 0             | 1  | 0        | 0  | 4          |
| Benin                               | 1           | 1992        | 0        | 1  | 1  | 0          | 0  | 0             | 1  | 0        | 0  | 3          |
| Bermuda (UK)                        | -99         | 0           | 0        | 0  | 0  | 0          | 0  | 0             | 0  | 0        | 0  | 0          |
| Bhutan**                            | 1           | 2019        | 0        | 0  | 1  | 1          | 0  | 1             | 1  | 1        | 1  | 6          |
| Bolivia                             | 1           | 2013        | 1        | 1  | 1  | 1          | 0  | 0             | 1  | 1        | 1  | 7          |
| Bonaire (Neth.)                     | -99         | 0           | 0        | 0  | 0  | 0          | 0  | 0             | 0  | 0        | 0  | 0          |
| Bosnia and Herzegovina              | 1           | 0           | 0        | 0  | 0  | 0          | 0  | 0             | 0  | 0        | 0  | 0          |
| Botswana                            | 1           | 2015        | 1        | 1  | 1  | 1          | 0  | 0             | 1  | 1        | 0  | 6          |
| Brazil                              | 2           | 2017        | 1        | 1  | 1  | 1          | 1  | 1             | 1  | 1        | 1  | 9          |
| British Indian Ocean Territory (UK) | -99         | 0           | 0        | 0  | 0  | 0          | 0  | 0             | 0  | 0        | 0  | 0          |
| British Virgin Islands (UK)         | -99         | 0           | 0        | 0  | 0  | 0          | 0  | 0             | 0  | 0        | 0  | 0          |
| Brunei Darussalam                   | 0           | 0           | 0        | 0  | 0  | 0          | 0  | 0             | 0  | 0        | 0  | 0          |
| Bulgaria                            | 1           | 2020        | 1        | 0  | 1  | 1          | 1  | 1             | 1  | 1        | 1  | 8          |
| Burkina Faso                        | 2           | 2006        | 1        | 1  | 1  | 1          | 0  | 0             | 1  | 1        | 0  | 6          |





|                                 |     |      |   |   |   |   |   |   |   |   |   |   |
|---------------------------------|-----|------|---|---|---|---|---|---|---|---|---|---|
| Isle of Man (UK)                | -99 | 0    | 0 | 0 | 0 | 0 | 0 | 0 | 0 | 0 | 0 | 0 |
| Israel                          | 2   | 2017 | 1 | 1 | 1 | 1 | 1 | 1 | 1 | 0 | 1 | 8 |
| Italy                           | 2   | 2010 | 1 | 1 | 1 | 1 | 1 | 1 | 1 | 1 | 1 | 9 |
| Jamaica                         | 1   | 2007 | 1 | 1 | 1 | 1 | 0 | 0 | 1 | 1 | 0 | 6 |
| Japan                           | 1   | 2020 | 1 | 1 | 1 | 1 | 1 | 1 | 1 | 1 | 1 | 9 |
| Jarvis Island (US)              | -99 | 0    | 0 | 0 | 0 | 0 | 0 | 0 | 0 | 0 | 0 | 0 |
| Jersey (UK)                     | -99 | 0    | 0 | 0 | 0 | 0 | 0 | 0 | 0 | 0 | 0 | 0 |
| Johnston Atoll (US)             | -99 | 0    | 0 | 0 | 0 | 0 | 0 | 0 | 0 | 0 | 0 | 0 |
| Jordan                          | 1   | 2017 | 1 | 1 | 1 | 1 | 1 | 1 | 1 | 1 | 1 | 9 |
| Kazakhstan                      | 1   | 2007 | 1 | 1 | 1 | 1 | 1 | 0 | 0 | 1 | 0 | 6 |
| Kenya*                          | 2   | 2019 | 1 | 0 | 1 | 1 | 0 | 0 | 1 | 1 | 0 | 5 |
| Kingman Reef (US)               | -99 | 0    | 0 | 0 | 0 | 0 | 0 | 0 | 0 | 0 | 0 | 0 |
| Kiribati                        | -99 | 0    | 0 | 0 | 0 | 0 | 0 | 0 | 0 | 0 | 0 | 0 |
| Korea, Dem. People's Rep.       | 0   | 0    | 0 | 0 | 0 | 0 | 0 | 0 | 0 | 0 | 0 | 0 |
| Korea, Rep.                     | 1   | 2020 | 1 | 0 | 1 | 1 | 0 | 0 | 1 | 1 | 0 | 5 |
| Kosovo                          | -99 | 0    | 0 | 0 | 0 | 0 | 0 | 0 | 0 | 0 | 0 | 0 |
| Kuwait                          | 1   | 0    | 0 | 0 | 0 | 0 | 0 | 0 | 0 | 0 | 0 | 0 |
| Kyrgyz Republic                 | 1   | 0    | 0 | 1 | 1 | 0 | 0 | 0 | 1 | 0 | 0 | 3 |
| Lao PDR                         | 1   | 2019 | 1 | 0 | 1 | 1 | 0 | 0 | 1 | 1 | 0 | 5 |
| Latvia                          | 0   | 2020 | 1 | 1 | 1 | 1 | 1 | 1 | 0 | 0 | 1 | 7 |
| Lebanon                         | 1   | 2010 | 1 | 1 | 1 | 1 | 1 | 0 | 0 | 1 | 0 | 6 |
| Lesotho                         | 1   | 2020 | 1 | 0 | 1 | 1 | 0 | 0 | 1 | 1 | 0 | 5 |
| Liberia                         | 1   | 0    | 0 | 0 | 0 | 0 | 0 | 0 | 0 | 0 | 0 | 0 |
| Libya                           | 0   | 2001 | 1 | 1 | 0 | 0 | 0 | 0 | 1 | 0 | 0 | 3 |
| Liechtenstein                   | 0   | 0    | 0 | 0 | 0 | 0 | 0 | 0 | 0 | 0 | 0 | 0 |
| Lithuania                       | 2   | 2020 | 1 | 0 | 1 | 1 | 1 | 1 | 1 | 0 | 1 | 7 |
| Luxembourg                      | 1   | 2020 | 1 | 1 | 1 | 1 | 1 | 1 | 1 | 0 | 1 | 8 |
| Macau (SAR, China)              | -99 | 0    | 0 | 0 | 0 | 0 | 0 | 0 | 0 | 0 | 0 | 0 |
| Madagascar                      | 1   | 2005 | 0 | 1 | 1 | 1 | 0 | 0 | 1 | 1 | 0 | 5 |
| Malawi                          | 2   | 2007 | 1 | 1 | 1 | 1 | 0 | 0 | 1 | 1 | 0 | 6 |
| Malaysia                        | 1   | 2005 | 1 | 1 | 0 | 0 | 0 | 0 | 1 | 0 | 0 | 3 |
| Maldives                        | 0   | 0    | 0 | 0 | 0 | 0 | 0 | 0 | 0 | 0 | 0 | 0 |
| Mali                            | 1   | 2004 | 0 | 1 | 1 | 1 | 0 | 0 | 1 | 1 | 0 | 5 |
| Malta                           | 2   | 2020 | 1 | 1 | 1 | 1 | 0 | 0 | 1 | 1 | 1 | 7 |
| Marshall Islands                | 0   | 2021 | 0 | 0 | 1 | 0 | 0 | 0 | 1 | 0 | 0 | 2 |
| Mauritania                      | 0   | 0    | 0 | 0 | 0 | 0 | 0 | 0 | 0 | 0 | 0 | 0 |
| Mauritius                       | 1   | 2014 | 1 | 1 | 1 | 1 | 0 | 0 | 1 | 1 | 0 | 6 |
| Mexico                          | 2   | 2016 | 1 | 1 | 1 | 1 | 1 | 0 | 1 | 1 | 1 | 8 |
| Micronesia, Federated States of | 0   | 0    | 0 | 0 | 0 | 0 | 0 | 0 | 0 | 0 | 0 | 0 |
| Midway Islands (US)             | -99 | 0    | 0 | 0 | 0 | 0 | 0 | 0 | 0 | 0 | 0 | 0 |
| Moldova                         | 1   | 2011 | 1 | 1 | 1 | 1 | 0 | 0 | 1 | 1 | 0 | 6 |



|                               |     |      |   |   |   |   |   |   |   |   |   |   |
|-------------------------------|-----|------|---|---|---|---|---|---|---|---|---|---|
| Monaco                        | -99 | 0    | 0 | 0 | 0 | 0 | 0 | 0 | 0 | 0 | 0 | 0 |
| Mongolia                      | 2   | 2011 | 1 | 1 | 1 | 1 | 0 | 0 | 1 | 1 | 0 | 6 |
| Montenegro                    | 1   | 2010 | 1 | 1 | 1 | 1 | 0 | 0 | 1 | 1 | 0 | 6 |
| Montserrat (UK)               | -99 | 0    | 0 | 0 | 0 | 0 | 0 | 0 | 0 | 0 | 0 | 0 |
| Morocco                       | 1   | 2016 | 1 | 1 | 1 | 1 | 0 | 0 | 1 | 0 | 0 | 5 |
| Mozambique                    | 1   | 2010 | 1 | 1 | 1 | 1 | 0 | 0 | 1 | 1 | 0 | 6 |
| Myanmar                       | 1   | 2010 | 1 | 1 | 1 | 1 | 0 | 0 | 1 | 1 | 0 | 6 |
| Namibia                       | 1   | 2013 | 1 | 1 | 1 | 1 | 0 | 0 | 1 | 1 | 0 | 6 |
| Nauru                         | 0   | 0    | 0 | 0 | 0 | 0 | 0 | 0 | 0 | 0 | 0 | 0 |
| Navassa Island (US)           | -99 | 0    | 0 | 0 | 0 | 0 | 0 | 0 | 0 | 0 | 0 | 0 |
| Nepal                         | 1   | 2011 | 1 | 1 | 1 | 1 | 0 | 0 | 1 | 1 | 0 | 6 |
| Netherlands                   | 1   | 2020 | 1 | 1 | 1 | 1 | 1 | 1 | 1 | 1 | 1 | 9 |
| New Caledonia (Fr.)           | 1   | 1991 | 0 | 1 | 1 | 0 | 0 | 0 | 0 | 0 | 0 | 2 |
| New Zealand                   | 2   | 2017 | 1 | 1 | 1 | 1 | 1 | 1 | 1 | 1 | 1 | 9 |
| Nicaragua                     | 1   | 2011 | 1 | 1 | 1 | 1 | 0 | 0 | 1 | 1 | 0 | 6 |
| Niger                         | 2   | 2004 | 1 | 1 | 1 | 1 | 0 | 0 | 1 | 1 | 0 | 6 |
| Nigeria                       | 1   | 0    | 0 | 0 | 0 | 0 | 0 | 0 | 0 | 0 | 0 | 0 |
| Niue (NZ)                     | 1   | 0    | 0 | 0 | 0 | 0 | 0 | 0 | 0 | 0 | 0 | 0 |
| Norfolk Island (Aus.)         | -99 | 0    | 0 | 0 | 0 | 0 | 0 | 0 | 0 | 0 | 0 | 0 |
| North Macedonia               | 1   | 2007 | 1 | 1 | 1 | 1 | 0 | 0 | 1 | 1 | 0 | 6 |
| Northern Mariana Islands (US) | 1   | 2018 | 1 | 1 | 1 | 1 | 1 | 1 | 1 | 1 | 1 | 9 |
| Norway                        | 1   | 2020 | 1 | 0 | 1 | 1 | 1 | 1 | 1 | 0 | 1 | 7 |
| Oman                          | 1   | 2012 | 1 | 1 | 1 | 0 | 0 | 0 | 1 | 0 | 0 | 4 |
| Pakistan                      | 2   | 2010 | 1 | 1 | 1 | 1 | 0 | 0 | 1 | 1 | 0 | 6 |
| Palau*                        | 1   | 2015 | 1 | 1 | 1 | 0 | 0 | 0 | 1 | 0 | 0 | 4 |
| Palmyra Atoll (US)            | -99 | 0    | 0 | 0 | 0 | 0 | 0 | 0 | 0 | 0 | 0 | 0 |
| Panama                        | 2   | 2011 | 1 | 1 | 1 | 1 | 1 | 1 | 1 | 1 | 1 | 9 |
| Papua New Guinea              | 0   | 0    | 0 | 0 | 0 | 0 | 0 | 0 | 0 | 0 | 0 | 0 |
| Paraguay                      | 2   | 2008 | 1 | 1 | 1 | 1 | 0 | 0 | 1 | 1 | 0 | 6 |
| Peru                          | 1   | 2012 | 1 | 1 | 1 | 1 | 0 | 0 | 1 | 1 | 0 | 6 |
| Philippines                   | 2   | 2012 | 1 | 1 | 1 | 1 | 0 | 0 | 1 | 1 | 0 | 6 |
| Pitcairn Islands (UK)         | -99 | 0    | 0 | 0 | 0 | 0 | 0 | 0 | 0 | 0 | 0 | 0 |
| Poland                        | 1   | 2020 | 1 | 0 | 1 | 1 | 1 | 1 | 1 | 1 | 1 | 8 |
| Portugal                      | 1   | 2019 | 1 | 1 | 1 | 1 | 1 | 1 | 1 | 1 | 1 | 9 |
| Puerto Rico (US)              | 1   | 2018 | 1 | 1 | 1 | 1 | 1 | 1 | 1 | 1 | 1 | 9 |
| Qatar                         | 1   | 2021 | 1 | 0 | 1 | 1 | 0 | 0 | 1 | 1 | 0 | 5 |
| Romania                       | 1   | 2020 | 1 | 1 | 1 | 1 | 1 | 1 | 1 | 1 | 1 | 9 |
| Russian Federation            | 2   | 2016 | 1 | 1 | 1 | 1 | 0 | 0 | 1 | 1 | 0 | 6 |
| Rwanda                        | 2   | 2008 | 1 | 1 | 1 | 1 | 0 | 0 | 1 | 1 | 0 | 6 |



|                          |     |      |   |   |   |   |   |   |   |   |   |   |
|--------------------------|-----|------|---|---|---|---|---|---|---|---|---|---|
| Syrian Arab Republic     | 0   | 0    | 0 | 0 | 0 | 0 | 0 | 0 | 0 | 0 | 0 | 0 |
| Tajikistan               | 0   | 2013 | 1 | 0 | 1 | 1 | 0 | 0 | 1 | 1 | 0 | 5 |
| Tanzania                 | 2   | 2019 | 1 | 1 | 1 | 1 | 0 | 0 | 1 | 1 | 0 | 6 |
| Thailand                 | 1   | 2013 | 1 | 1 | 1 | 1 | 1 | 1 | 1 | 1 | 1 | 9 |
| Timor-Leste              | 2   | 2019 | 1 | 1 | 1 | 1 | 0 | 0 | 1 | 1 | 0 | 6 |
| Togo                     | 1   | 2012 | 1 | 1 | 1 | 1 | 0 | 0 | 1 | 1 | 0 | 6 |
| Tokelau (NZ)             | 0   | 0    | 0 | 0 | 0 | 0 | 0 | 0 | 0 | 0 | 0 | 0 |
| Tonga                    | 1   | 2015 | 1 | 1 | 1 | 1 | 0 | 0 | 1 | 1 | 0 | 6 |
| Trinidad and Tobago      | 1   | 2004 | 0 | 1 | 1 | 1 | 0 | 0 | 1 | 1 | 0 | 5 |
| Tunisia                  | 1   | 2005 | 0 | 1 | 1 | 1 | 0 | 0 | 1 | 1 | 0 | 5 |
| Turkiye                  | 1   | 2001 | 1 | 1 | 1 | 0 | 0 | 0 | 1 | 0 | 0 | 4 |
| Turkmenistan             | 0   | 0    | 0 | 0 | 0 | 0 | 0 | 0 | 0 | 0 | 0 | 0 |
| Turks and Caicos Islands | -99 | 0    | 0 | 0 | 0 | 0 | 0 | 0 | 0 | 0 | 0 | 0 |
| Tuvalu*                  | 1   | 2017 | 1 | 1 | 1 | 1 | 0 | 0 | 1 | 1 | 0 | 6 |
| U.S. Virgin Islands (US) | 1   | 2018 | 1 | 1 | 1 | 1 | 1 | 1 | 1 | 1 | 1 | 9 |
| Uganda                   | 2   | 2008 | 1 | 1 | 1 | 1 | 0 | 0 | 1 | 1 | 0 | 6 |
| Ukraine                  | 1   | 0    | 0 | 0 | 0 | 0 | 0 | 0 | 0 | 0 | 0 | 0 |
| United Arab Emirates     | 0   | 0    | 0 | 0 | 0 | 0 | 0 | 0 | 0 | 0 | 0 | 0 |
| United Kingdom           | 1   | 2010 | 1 | 1 | 1 | 1 | 1 | 1 | 1 | 1 | 1 | 9 |
| United States            | 3   | 2017 | 1 | 1 | 1 | 1 | 1 | 1 | 1 | 1 | 1 | 9 |
| Uruguay                  | 1   | 2011 | 1 | 1 | 1 | 1 | 1 | 1 | 1 | 1 | 1 | 9 |
| Uzbekistan               | 0   | 0    | 0 | 0 | 0 | 0 | 0 | 0 | 0 | 0 | 0 | 0 |
| Vanuatu                  | 1   | 0    | 0 | 0 | 0 | 0 | 0 | 0 | 0 | 0 | 0 | 0 |
| Vatican City             | -99 | 0    | 0 | 0 | 0 | 0 | 0 | 0 | 0 | 0 | 0 | 0 |
| Venezuela, RB            | 1   | 2008 | 1 | 1 | 1 | 0 | 0 | 0 | 1 | 1 | 0 | 5 |
| Vietnam                  | 1   | 2016 | 1 | 1 | 1 | 1 | 0 | 0 | 1 | 1 | 0 | 6 |
| Wake Island (US)         | -99 | 0    | 0 | 0 | 0 | 0 | 0 | 0 | 0 | 0 | 0 | 0 |
| Wallis-et-Futuna (Fr.)   | -99 | 0    | 0 | 0 | 0 | 0 | 0 | 0 | 0 | 0 | 0 | 0 |
| West Bank and Gaza       | -99 | 0    | 0 | 0 | 0 | 0 | 0 | 0 | 0 | 0 | 0 | 0 |
| Yemen, Rep.              | 0   | 2002 | 1 | 1 | 1 | 0 | 0 | 0 | 1 | 0 | 0 | 4 |
| Zambia                   | 1   | 2000 | 0 | 1 | 1 | 1 | 0 | 0 | 1 | 1 | 0 | 5 |
| Zimbabwe                 | 0   | 0    | 0 | 0 | 0 | 0 | 0 | 0 | 0 | 0 | 0 | 0 |

38

39 \* Population census with agriculture module

40 \*\* Renewable natural resource census

41 \*\*\* Economic census (a chapter on agricultural production)
